# Supplementary material
Source: MDPI journal article supplement (https://www.mdpi.com/2076-3263/12/9/346)
Supplement: s1 [file s1]

Supplementary Table S1: Stable C and O isotope compilation of pedogenic calcite in the Cedar Mountain Formation

| Formation, member, reference | $\delta^{18}\text{O}$ (VPDB) | $\delta^{13}\text{C}$ (VPDB) | Material              |
|------------------------------|------------------------------|------------------------------|-----------------------|
| CMF, Poison Strip [37]       | -8.8                         | -3.5                         | Oncoid calcite        |
|                              | -8.8                         | -3.4                         | Oncoid calcite        |
|                              | -8.8                         | -3.6                         | Oncoid calcite        |
|                              | -11.0                        | -8.3                         | Oncoid calcite        |
|                              | -10.5                        | -6.1                         | Oncoid calcite        |
|                              | -8.7                         | -3.9                         | Oncoid calcite        |
|                              | -8.7                         | -3.8                         | Oncoid calcite        |
|                              | -8.8                         | -3.7                         | Oncoid calcite        |
|                              | -9.5                         | -4.1                         | Oncoid calcite        |
|                              | -8.9                         | -3.9                         | Oncoid calcite        |
|                              | -8.8                         | -3.9                         | Oncoid calcite        |
|                              | -8.8                         | -3.8                         | Oncoid calcite        |
|                              | -8.5                         | -3.3                         | Oncoid calcite        |
|                              | -8.4                         | -3.2                         | Oncoid calcite        |
|                              | -8.5                         | -3.5                         | Oncoid calcite        |
| CMF, Ruby Ranch [40]         | -8.4                         | -6.3                         | Micrite               |
|                              | -8.4                         | -6.4                         | Micrite               |
|                              | -8.4                         | -6.3                         | Micrite               |
|                              | -8.5                         | -7                           | Micrite               |
|                              | -8.5                         | -7.2                         | Micrite               |
|                              | -8.4                         | -7.5                         | Micrite               |
|                              | -8.4                         | -6.5                         | Micrite               |
|                              | -8.5                         | -6.4                         | Micrite               |
|                              | -8.5                         | -6.6                         | Micrite               |
|                              | -8.6                         | -6.5                         | Micrite               |
|                              | -8.6                         | -6                           | Micrite               |
|                              | -8.6                         | -5.1                         | Micrite               |
|                              | -8.8                         | -4.8                         | Micrite               |
|                              | -8.8                         | -5                           | Micrite               |
|                              | -8.9                         | -5                           | Zone 1 cement         |
|                              | -9                           | -5.1                         | Zone 1 cement         |
|                              | -9.1                         | -5.2                         | Zone 1 cement         |
|                              | -9.2                         | -5.2                         | Zone 1 cement         |
|                              | -9.5                         | -5.5                         | Zone 1 cement         |
|                              | -9.7                         | -5.3                         | Zone 1 cement         |
|                              | -10                          | -5.3                         | Zone 1 cement         |
|                              | -10.1                        | -5.3                         | Zone 1 cement         |
|                              | -10.2                        | -5.4                         | Zone 1 cement         |
|                              | -10.1                        | -5.5                         | Zone 1 cement         |
|                              | -9.8                         | -5.8                         | Intergranular sparite |
|                              | -10.2                        | -5.8                         | Intergranular sparite |
|                              | -10.2                        | -5.8                         | Intergranular sparite |
|                              | -10.3                        | -6                           | Intergranular sparite |
|                              | -10.1                        | -6.2                         | Vein calcite          |
|                              | -11.5                        | -5.2                         | Zone 2 cement         |
|                              | -12                          | -5.3                         | Zone 2 cement         |
|                              | -13.1                        | -6.3                         | Zone 2 cement         |
|                              | -13.5                        | -6.3                         | Zone 2 cement         |
|                              | -13.6                        | -6.3                         | Zone 2 cement         |
|                              | -14.1                        | -6.4                         | Zone 2 cement         |
|                              | -14.4                        | -6.2                         | Zone 2 cement         |
|                              | -14.6                        | -6.2                         | Zone 2 cement         |

|                       |       |      |                      |
|-----------------------|-------|------|----------------------|
|                       | -14.9 | -6   | Zone 2 cement        |
|                       | -15.1 | -6.1 | Zone 2 cement        |
|                       | -15.6 | -5   | Zone 2 cement        |
|                       | -16.2 | -6.2 | Zone 2 cement        |
|                       | -16.8 | -6.2 | Zone 2 cement        |
|                       | -16.9 | -6   | Zone 2 cement        |
|                       | -17   | -6   | Zone 2 cement        |
|                       | -17.1 | -5.8 | Luminescent cement   |
|                       | -17.2 | -5.9 | Luminescent cement   |
|                       | -17.3 | -5.9 | Luminescent cement   |
|                       | -16.8 | -6   | Luminescent cement   |
|                       | -16.8 | -6.2 | Luminescent cement   |
|                       | -16.9 | -6.4 | Luminescent cement   |
|                       | -17.1 | -6.4 | Luminescent cement   |
|                       | -17   | -6.5 | Luminescent cement   |
|                       | -17.1 | -6.2 | Luminescent cement   |
|                       | -17.2 | -6.3 | Luminescent cement   |
|                       | -17.4 | -6.8 | Luminescent cement   |
|                       | -17.8 | -6.7 | Luminescent cement   |
| CMF, Ruby Ranch, [22] | -13.5 | -5.8 | Microfacies 1        |
|                       | -13.9 | -6.3 | Microfacies 1        |
|                       | -7.8  | -5.5 | Microfacies 2        |
|                       | -7.7  | -5.3 | Microfacies 2        |
|                       | -7.9  | -5.6 | Microfacies 2        |
|                       | -7.9  | -5.4 | Microfacies 2        |
|                       | -8.1  | -5.5 | Microfacies 2        |
|                       | -7.8  | -5.6 | Microfacies 2        |
|                       | -7.9  | -5.5 | Microfacies 2        |
|                       | -7.3  | -4.7 | Microfacies 3        |
|                       | -7.1  | -4.6 | Microfacies 3        |
|                       | -7.3  | -4.9 | Microfacies 3        |
|                       | -7.6  | -4.8 | Microfacies 3        |
|                       | -11   | -5.9 | Microfacies 4 (spar) |
|                       | -3.3  | -1.7 | Microfacies 4        |
|                       | -3.5  | -2.9 | Microfacies 4        |
|                       | -5.6  | -3.6 | Microfacies 4        |
|                       | -6.7  | -5   | Microfacies 4 (spar) |
|                       | -3.7  | -4.4 | Microfacies 4        |
|                       | -3.2  | -3.8 | Microfacies 4        |
|                       | -9.5  | -5.8 | Microfacies 5        |
|                       | -9.1  | -6.1 | Microfacies 5        |
|                       | -8.3  | -5.9 | Microfacies 5        |
|                       | -8.6  | -5.1 | Microfacies 5        |
|                       | -7.5  | -5.3 | Microfacies 5        |
|                       | -7.4  | -5.5 | Microfacies 5        |
|                       | -8.6  | -5   | Microfacies 5        |
|                       | -8.9  | -5.2 | Microfacies 5        |
|                       | -8.8  | -5.2 | Microfacies 5        |

Supplementary Table S2: Isotope Dilution data for U-Pb

| sample | weight<br>(mg) | U<br>(ppm) | Pb<br>(ppm) | $^{238}\text{U}/^{206}\text{Pb}$ | 2 $\sigma$ %<br>uncert | $^{207}\text{Pb}/^{206}\text{Pb}$ | 2 $\sigma$ %<br>uncert | $^{204}\text{Pb}/^{206}\text{Pb}$ | 2 $\sigma$ %<br>uncert | $^{208}\text{Pb}/^{204}\text{Pb}$ |
|--------|----------------|------------|-------------|----------------------------------|------------------------|-----------------------------------|------------------------|-----------------------------------|------------------------|-----------------------------------|
| RRR1   | 2.49           | 592        | 44.4        | 28.20                            | 1.2                    | 0.43107                           | 0.04                   | 0.02599                           | 0.09                   | 38.277                            |
| RRR2   | 10.05          | 185        | 7.04        | 40.26                            | 1.2                    | 0.24569                           | 0.06                   | 0.01335                           | 0.15                   | 38.771                            |
| RRR3   | 6.09           | 114        | 27.3        | 11.99                            | 1.1                    | 0.67007                           | 0.04                   | 0.04233                           | 0.08                   | 38.048                            |

|      |       |     |      |       |     |         |      |         |      |        |
|------|-------|-----|------|-------|-----|---------|------|---------|------|--------|
| RRR4 | 18.96 | 135 | 3.88 | 45.11 | 1.5 | 0.17367 | 0.21 | 0.00850 | 0.32 | 38.505 |
| RRR5 | 10.43 | 265 | 6.73 | 47.20 | 1.1 | 0.14178 | 0.07 | 0.00635 | 0.17 | 38.510 |

Supplementary Table S3: Laser Ablation data from Stony Brook University

| spot | U<br>ppm | 2SD  | Th<br>ppm | 2SD  | Pb<br>ppm | 2SD | <sup>238</sup> U/ <sup>206</sup> Pb | 2 σ %<br>uncert | <sup>207</sup> Pb/ <sup>206</sup> Pb | 2 σ %<br>uncert | rho   |
|------|----------|------|-----------|------|-----------|-----|-------------------------------------|-----------------|--------------------------------------|-----------------|-------|
|      | 76.9     | 10.7 | 0.47      | 0.08 | 3.9       | 1.1 | 29.05                               | 14.4            | 0.3782                               | 22.5            | 0.51  |
| 1    | 62.3     | 9.7  | 0.49      | 0.09 | 3.6       | 1.0 | 31.16                               | 8.1             | 0.3858                               | 9.6             | 0.04  |
|      | 65.4     | 10.2 | 0.44      | 0.08 | 3.1       | 0.7 | 30.29                               | 11.1            | 0.4326                               | 16.4            | -0.02 |
|      | 61.5     | 9.9  | 0.42      | 0.07 | 4.7       | 1.7 | 25.78                               | 13.3            | 0.4375                               | 14.7            | 0.24  |
| 2    | 56.9     | 8.8  | 0.44      | 0.09 | 5.7       | 1.1 | 23.22                               | 9.7             | 0.4677                               | 8.5             | 0.03  |
| 3    | 59.2     | 9.8  | 0.46      | 0.09 | 3.6       | 1.0 | 29.78                               | 6.3             | 0.3252                               | 10.3            | 0.17  |
| 4    | 65.4     | 9.5  | 0.45      | 0.08 | 3.3       | 0.9 | 29.92                               | 10.0            | 0.3119                               | 10.3            | 0.12  |
|      | 64.4     | 9.3  | 0.47      | 0.08 | 4.1       | 1.5 | 32.71                               | 8.7             | 0.4139                               | 22.8            | -0.16 |
|      | 57.1     | 9.3  | 0.38      | 0.08 | 2.6       | 0.7 | 31.70                               | 7.6             | 0.3650                               | 35.1            | -0.05 |
| 5    | 125.0    | 22.2 | 0.29      | 0.05 | 2.2       | 0.6 | 42.00                               | 7.5             | 0.1866                               | 9.2             | 0.04  |
| 6    | 58.9     | 10.0 | 0.33      | 0.07 | 2.2       | 0.6 | 34.42                               | 6.8             | 0.2823                               | 9.6             | -0.06 |
| 7    | 135.9    | 18.3 | 0.31      | 0.06 | 2.1       | 0.6 | 43.35                               | 5.7             | 0.1518                               | 7.3             | 0.00  |
|      | 61.9     | 9.4  | 0.42      | 0.08 | 3.1       | 1.0 | 32.26                               | 6.9             | 0.3317                               | 16.3            | -0.61 |
| 8    | 115.2    | 18.5 | 0.30      | 0.06 | 2.5       | 0.7 | 41.41                               | 5.6             | 0.1810                               | 9.2             | -0.15 |
| 9    | 111.6    | 17.6 | 0.29      | 0.05 | 1.9       | 0.4 | 39.51                               | 6.1             | 0.1877                               | 7.1             | -0.06 |
| 10   | 150.4    | 23.2 | 0.33      | 0.06 | 2.4       | 0.6 | 40.89                               | 5.5             | 0.1684                               | 9.9             | 0.26  |
| 11   | 153.1    | 20.5 | 0.28      | 0.05 | 4.4       | 1.3 | 41.56                               | 5.7             | 0.2279                               | 11.1            | 0.06  |
|      | 178.5    | 29.5 | 0.31      | 0.06 | 4.5       | 2.9 | 42.25                               | 6.2             | 0.2057                               | 14.2            | -0.56 |
| 12   | 303.2    | 47.6 | 0.34      | 0.05 | 2.2       | 0.5 | 49.15                               | 4.6             | 0.1344                               | 11.4            | 0.16  |
| 13   | 335.8    | 55.3 | 0.25      | 0.06 | 3.5       | 1.2 | 45.91                               | 4.4             | 0.1494                               | 11.8            | 0.04  |
| 14   | 378.5    | 62.2 | 0.21      | 0.05 | 1.8       | 0.6 | 49.03                               | 3.7             | 0.0860                               | 5.9             | -0.16 |
| 15   | 425.7    | 65.3 | 0.22      | 0.04 | 2.3       | 0.5 | 48.60                               | 6.5             | 0.0992                               | 9.3             | 0.15  |
| 16   | 328.1    | 51.4 | 0.22      | 0.04 | 2.4       | 0.8 | 47.46                               | 4.1             | 0.1247                               | 13.6            | 0.25  |
| 17   | 368.7    | 59.9 | 0.22      | 0.04 | 1.2       | 0.3 | 48.94                               | 3.9             | 0.0855                               | 7.8             | -0.31 |
|      | 307.5    | 51.6 | 0.23      | 0.05 | 1.4       | 0.3 | 49.12                               | 3.2             | 0.1227                               | 25.8            | -0.22 |
| 18   | 217.7    | 32.9 | 0.23      | 0.04 | 3.3       | 0.9 | 40.93                               | 5.1             | 0.1704                               | 7.7             | -0.45 |
| 19   | 279.5    | 46.7 | 0.24      | 0.05 | 1.4       | 0.4 | 49.31                               | 4.3             | 0.0981                               | 7.3             | -0.35 |
| 20   | 248.7    | 46.2 | 0.20      | 0.04 | 2.4       | 0.8 | 48.72                               | 3.7             | 0.1064                               | 11.2            | -0.19 |
| 21   | 211.6    | 32.8 | 0.24      | 0.05 | 3.6       | 0.4 | 41.72                               | 4.1             | 0.2107                               | 7.4             | -0.10 |

Supplementary Table S4: Laser Ablation data from the University of Kansas

| spot | U<br>ppm | 2SD  | Th<br>ppm | 2SD    | Pb<br>ppm | 2SD   | <sup>238</sup> U/ <sup>206</sup> Pb | 2 σ %<br>uncert | <sup>207</sup> Pb/ <sup>206</sup> Pb | 2 σ %<br>uncert | rho     |
|------|----------|------|-----------|--------|-----------|-------|-------------------------------------|-----------------|--------------------------------------|-----------------|---------|
| 1    | 133.8    | 1.5  | 0.1714    | 0.0041 | 0.726     | 0.022 | 47.9819                             | 8.8             | 0.0986                               | 1.1             | 0.1023  |
| 2    | 131.8    | 1.4  | 0.1802    | 0.0049 | 1.244     | 0.083 | 45.2134                             | 8.7             | 0.1280                               | 3.3             | -0.1373 |
| 3    | 67.55    | 0.66 | 0.1652    | 0.0043 | 0.775     | 0.03  | 44.5294                             | 8.7             | 0.1456                               | 2.0             | -0.1116 |

|    |       |       |        |        |        |        |         |     |        |     |         |
|----|-------|-------|--------|--------|--------|--------|---------|-----|--------|-----|---------|
| 4  | 97.6  | 1.3   | 0.1697 | 0.004  | 0.826  | 0.032  | 46.1118 | 8.7 | 0.1223 | 1.5 | -0.0407 |
| 5  | 130.6 | 1.4   | 0.1434 | 0.0033 | 0.715  | 0.027  | 48.2120 | 8.7 | 0.0995 | 1.6 | 0.0452  |
| 6  | 87.3  | 1.5   | 0.1489 | 0.0048 | 0.818  | 0.028  | 45.7621 | 8.7 | 0.1309 | 1.7 | 0.0531  |
| 7  | 105.9 | 2.5   | 0.1469 | 0.0037 | 0.689  | 0.027  | 46.3955 | 8.7 | 0.1070 | 1.7 | 0.4055  |
| 8  | 168.1 | 1.2   | 0.1998 | 0.0053 | 1.225  | 0.058  | 48.0010 | 8.7 | 0.1150 | 2.3 | -0.3641 |
| 9  | 176.4 | 5.2   | 0.1644 | 0.0065 | 2.25   | 0.23   | 45.2304 | 8.7 | 0.1611 | 4.7 | -0.6530 |
| 10 | 196.8 | 2.7   | 0.17   | 0.0053 | 0.91   | 0.048  | 49.3153 | 8.7 | 0.0905 | 1.0 | 0.3078  |
| 11 | 286.4 | 3.1   | 0.1547 | 0.0031 | 0.797  | 0.024  | 51.9477 | 8.7 | 0.0759 | 1.2 | 0.0978  |
| 12 | 191.3 | 3.4   | 0.1466 | 0.0039 | 0.866  | 0.035  | 47.5097 | 8.7 | 0.0900 | 1.4 | 0.0622  |
| 13 | 66.3  | 0.83  | 0.1494 | 0.0034 | 0.82   | 0.031  | 43.4081 | 8.7 | 0.1504 | 2.3 | 0.0583  |
| 14 | 101.2 | 1.6   | 0.1395 | 0.0035 | 0.624  | 0.015  | 46.5745 | 8.8 | 0.1041 | 2.2 | 0.6372  |
| 15 | 109   | 2.2   | 0.153  | 0.0048 | 0.582  | 0.02   | 49.3355 | 8.7 | 0.1000 | 1.8 | 0.0564  |
| 16 | 85.8  | 1.6   | 0.109  | 0.0042 | 0.505  | 0.025  | 48.6199 | 8.7 | 0.1033 | 2.1 | -0.0450 |
| 17 | 55.6  | 1.7   | 0.1561 | 0.0032 | 0.714  | 0.027  | 43.5334 | 8.7 | 0.1574 | 2.1 | 0.2264  |
| 18 | 57.89 | 0.87  | 0.1388 | 0.0032 | 0.785  | 0.026  | 43.5648 | 8.7 | 0.1614 | 2.1 | 0.1451  |
| 19 | 79.4  | 1.6   | 0.134  | 0.0031 | 0.836  | 0.025  | 43.1289 | 8.7 | 0.1332 | 1.6 | 0.3274  |
| 20 | 2.25  | 0.1   | 0.0046 | 0.0011 | 0.1603 | 0.0083 | 26.8166 | 8.9 | 0.4330 | 6.0 | -0.1180 |
| 21 | 4.43  | 0.18  | 0.0105 | 0.0019 | 0.156  | 0.011  | 35.6920 | 9.0 | 0.2960 | 4.4 | -0.1399 |
| 22 | 3.433 | 0.093 | 0.0484 | 0.0019 | 0.3179 | 0.0084 | 23.3911 | 8.7 | 0.4714 | 1.6 | -0.1314 |
| 23 | 1.825 | 0.039 | 0.1572 | 0.0043 | 0.673  | 0.016  | 8.9854  | 8.8 | 0.6700 | 1.5 | 0.4702  |
| 24 | 3.684 | 0.04  | 0.157  | 0.0038 | 0.637  | 0.019  | 15.8158 | 8.8 | 0.5704 | 1.3 | 0.2322  |
| 25 | 79.7  | 1     | 0.1659 | 0.0048 | 0.741  | 0.029  | 45.0110 | 8.8 | 0.1291 | 1.8 | -0.2485 |
| 26 | 164.4 | 2.7   | 0.1649 | 0.0048 | 0.797  | 0.029  | 47.1017 | 8.8 | 0.0919 | 1.3 | 0.3541  |
| 27 | 240.9 | 3.2   | 0.1517 | 0.0063 | 1.159  | 0.049  | 45.3323 | 8.7 | 0.0902 | 1.8 | 0.3662  |
| 28 | 232.9 | 4     | 0.166  | 0.0044 | 0.774  | 0.025  | 51.4823 | 8.6 | 0.0817 | 1.3 | 0.6963  |
| 29 | 247.1 | 4.5   | 0.1601 | 0.0049 | 1.17   | 0.047  | 48.3278 | 8.7 | 0.0918 | 1.8 | 0.3014  |
| 30 | 196   | 2.5   | 0.1324 | 0.0041 | 0.71   | 0.027  | 49.9895 | 8.7 | 0.0828 | 1.6 | 0.0799  |
| 31 | 181.3 | 2.6   | 0.1196 | 0.0026 | 0.727  | 0.029  | 51.7917 | 8.6 | 0.0875 | 2.3 | 0.1181  |
| 32 | 28.09 | 0.79  | 0.1554 | 0.0065 | 0.708  | 0.033  | 39.4490 | 8.9 | 0.2386 | 2.2 | -0.2167 |
| 33 | 46.31 | 0.93  | 0.096  | 0.0032 | 0.452  | 0.022  | 44.9440 | 9.1 | 0.1314 | 2.5 | 0.3228  |
| 34 | 25.57 | 0.39  | 0.1614 | 0.0048 | 0.604  | 0.017  | 37.9958 | 8.7 | 0.2275 | 2.1 | -0.0268 |
| 35 | 22.98 | 0.38  | 0.1364 | 0.0029 | 0.514  | 0.015  | 39.6174 | 8.7 | 0.2198 | 1.1 | 0.3288  |
| 36 | 21.78 | 0.43  | 0.1239 | 0.0055 | 0.822  | 0.044  | 36.3368 | 8.7 | 0.3105 | 2.1 | 0.0455  |
| 37 | 7.04  | 0.22  | 0.1591 | 0.0052 | 0.769  | 0.019  | 20.8419 | 8.8 | 0.4887 | 1.3 | -0.0420 |
| 38 | 13.84 | 0.3   | 0.1572 | 0.0033 | 0.673  | 0.017  | 31.3441 | 8.7 | 0.3445 | 1.4 | 0.5407  |
| 39 | 17.31 | 0.13  | 0.1677 | 0.0055 | 0.924  | 0.017  | 31.1579 | 8.7 | 0.3704 | 1.6 | 0.4988  |
| 40 | 12.03 | 0.17  | 0.1416 | 0.0042 | 0.979  | 0.025  | 25.2035 | 8.8 | 0.4433 | 1.0 | 0.3888  |
| 41 | 159.7 | 3.1   | 0.1253 | 0.0032 | 0.563  | 0.029  | 49.3355 | 8.7 | 0.0820 | 1.6 | -0.1084 |
| 42 | 101   | 1.3   | 0.1602 | 0.0042 | 0.748  | 0.022  | 45.7101 | 8.7 | 0.1135 | 1.4 | -0.0134 |
